1 **Single-cell molecular profiling provides a high-resolution map of basophil and**  
2 **mast cell differentiation**

3

4 Fiona K. Hamey<sup>1,2</sup>, Winnie W.Y. Lau<sup>1</sup>, Iwo Kucinski<sup>1</sup>, Xiaonan Wang<sup>1</sup>, Evangelia  
5 Diamanti<sup>1</sup>, Nicola K. Wilson<sup>1</sup>, Berthold Göttgens<sup>1,\*</sup>, Joakim S. Dahlin<sup>1,3,\*</sup>

6

7

8 1 Department of Haematology, University of Cambridge, Wellcome–Medical  
9 Research Council Cambridge Stem Cell Institute, Cambridge, United Kingdom.

10 2 Present address: JDRF/Wellcome Diabetes and Inflammation Laboratory,  
11 Wellcome Centre for Human Genetics, University of Oxford, Oxford, UK.

12 3 Department of Medicine, Karolinska Institutet and Karolinska University Hospital,  
13 Stockholm, Sweden

14

15 \*: Corresponding authors

16 B. Göttgens; Address: University of Cambridge, Department of Haematology,  
17 Wellcome–Medical Research Council Cambridge Stem Cell Institute, Jeffrey Cheah  
18 Biomedical Centre, Cambridge Biomedical Campus, Cambridge CB2 0AW, UK; E-  
19 mail: bg200@cam.ac.uk; Tel. +44-1223-336829; FAX +44-1223-762670

20

21 J. Dahlin; Address: NKS BioClinicum J7:30, Visionsgatan 4, 171 76 Solna, Sweden;  
22 E-mail: joakim.dahlin@ki.se; Tel. +46-8-517 761 69

23

24

25 Abstract word count: 222

26 Text word count: 4478

27 No of figures: 4

28 No of tables: 0

29 No of references: 36

30

31 **Abstract**

32 Differentiation of hematopoietic stem and progenitor cells ensure a continuous supply  
33 of mature blood cells. Recent models of differentiation are represented as a landscape,  
34 in which individual progenitors traverse a continuum of multipotent cell states before  
35 reaching an entry point that marks lineage commitment. Basophils and mast cells  
36 have received little attention in these models and their differentiation trajectories are  
37 yet to be explored. Here, we have performed multicolor flow cytometry and high-  
38 coverage single-cell RNA sequencing analyses to chart the differentiation of  
39 hematopoietic progenitors into basophils and mast cells in mouse. Analysis of flow  
40 cytometry data reconstructed a detailed map of the differentiation, including a  
41 bifurcation of progenitors into two specific trajectories. Molecular profiling and  
42 pseudotime ordering of the single cells revealed gene expression changes during  
43 differentiation, with temporally separated regulation of mast cell protease genes. We  
44 validate that basophil and mast cell signature genes increased along the trajectories  
45 into their respective lineage, and we demonstrate how genes critical for each  
46 respective lineage are upregulated during the formation of the mature cells. Cell fate  
47 assays showed that multicolor flow cytometry and transcriptional profiling  
48 successfully predict the bipotent phenotype of a previously uncharacterized  
49 population of basophil-mast cell progenitor-like cells in mouse peritoneum. Taken  
50 together, we provide a detailed roadmap of basophil and mast cell development  
51 through a combination of molecular and functional profiling.

52

53

54

55 **Introduction**

56 Hematopoietic stem and progenitor cells (HSPCs) constitutively generate blood cells,  
57 including erythrocytes, platelets, granulocytes, macrophages, and lymphocytes. The  
58 hierarchical model of hematopoiesis, with distinct megakaryocyte-erythroid,  
59 granulocyte-monocyte, and lymphoid branches, was the dominating representation of  
60 the differentiation process before the introduction of single-cell RNA sequencing.<sup>1</sup>  
61 Recent groundbreaking studies that couple single-cell transcriptomics and cell fate  
62 assays reveal that blood cell differentiation more likely represents a landscape of cell  
63 states with continuous progression from progenitors into the mature cell lineages.<sup>2-6</sup>

64

65 Mast cells and basophils constitute two cell types of the hematopoietic system, whose  
66 differentiation trajectories are yet to be deciphered. Mast cells are sentinel cells that  
67 are strategically positioned throughout the body and allow rapid triggering of the  
68 immune system upon infection.<sup>7</sup> Along with basophils, their activation results in  
69 prompt release of proteases and histamine from the cytoplasmic granules as well as  
70 synthesis of cytokines and chemokines. These mediators in turn cause inflammation,  
71 vasodilation, and leukocyte recruitment to the site of triggering.<sup>7</sup> A similar cascade is  
72 initiated following IgE-allergen-mediated cell activation that causes allergic  
73 symptoms in patients.

74

75 Bone marrow HSPCs give rise to basophil and mast cells,<sup>8</sup> and single-cell  
76 transcriptomics of Lin<sup>-</sup> c-Kit<sup>+</sup> mouse bone marrow progenitors recently uncovered the  
77 gene expression changes during the transition from hematopoietic stem cells to  
78 common bipotent basophil-mast cell progenitor (BMCP).<sup>3</sup> However, the further  
79 progression of BMCPs to basophils and mast cells is yet to be delineated.



80

81 Here, we combine multicolor FACS index sorting with high-coverage single-cell  
82 RNA sequencing to investigate the basophil-mast cell bifurcation and the  
83 differentiation into each respective lineage. We demonstrate that molecular profiling  
84 and pseudotime ordering of single cells highlights genes that are critical for cell  
85 differentiation and maturation. The analysis is accompanied with the generation of a  
86 user-friendly web resource that allows gene expression to be explored across the  
87 single-cell landscape. Finally, we use cell-fate assays to show that single-cell  
88 transcriptomics and protein epitope data analysis successfully predict the fate  
89 potential of the previously uncharacterized BMCP-like cell population in the  
90 peritoneal cavity. Taken together, the current resource provides a detailed roadmap of  
91 two rare and developmentally related hematopoietic cells, whose activation  
92 contributes to a broad range of human diseases.

93

## 94 **Methods**

95

### 96 *Cell isolation and flow cytometry*

97 Experiments involving mice were performed according to the United Kingdom Home  
98 Office regulations. PBS with 2 % fetal calf serum (Sigma-Aldrich, St Louis, MO) and  
99 1 mM EDTA was injected into the peritoneal cavity of euthanized C57BL/6 mice.  
100 The fluid was aspirated following vigorous massage, and the cells were prepared for  
101 fluorescence-activated cell sorting (FACS). Peritoneal lavage samples with excessive  
102 blood contamination were discarded before data acquisition. Bone marrow cells were  
103 extracted by flushing or crushing the femurs, tibias, and/or ilia. Red blood cells were  
104 lysed and the remaining cells were prepared for FACS. The cells were sorted with a

105 BD Influx cell sorter (BD Biosciences, San Jose, CA). Cell doublets were excluded  
106 with the width parameters. BMCP-like cells and mast cells were sorted two  
107 consecutive times for cell culture experiments. The cells were sorted into Terasaki  
108 plates (Greiner Bio-One, Kremsmünster, Austria) or 96-well plate wells. Visual  
109 inspection determined colony sizes following culture, and the size was set to 1 if no  
110 live cells were observed in a particular well. Flow cytometry was typically performed  
111 on colonies constituting at least 20 cells as described previously.<sup>3</sup> Cultured cells were  
112 analyzed with the BD Fortessa flow cytometers (BD Biosciences).

113

#### 114 *Antibodies and cell staining*

115 Primary cells were incubated with the antibodies mouse hematopoietic progenitor cell  
116 isolation cocktail, integrin  $\beta 7$  (clone FIB504), CD34 (RAM34), Sca-1 (D7), CD16/32  
117 (93), c-Kit (2B8), Fc $\epsilon$ RI (MAR-1), IL-33R $\alpha$ /ST2 (DIH9), and/or CD49b (DX5).  
118 Cultured cells were stained with c-Kit, Fc $\epsilon$ RI, CD49b, with or without TER119  
119 (TER119). Fc-block (clone 93) was used where appropriate. The antibodies were  
120 from STEMCELL Technologies (Vancouver, Canada), BD Biosciences, Biolegend  
121 (San Diego, CA), and Thermo Fisher Scientific (Waltham, MA). DAPI (BD  
122 Biosciences) or 7-AAD (Thermo Fisher Scientific) were used to exclude dead cells.

123

#### 124 *Cell culture*

125 The cells were cultured for 6-7 days in IMDM (Sigma-Aldrich) with 20 % heat-  
126 inactivated fetal calf serum (Sigma-Aldrich), 100 U/ml penicillin (Sigma-Aldrich),  
127 0.1 mg/ml streptomycin (Sigma-Aldrich), 50-200  $\mu$ M  $\beta$ -mercaptoethanol (Thermo  
128 Fisher Scientific). The medium was supplemented with 20 ng/ml IL-3 and 100 ng/ml  
129 stem cell factor, or 80 ng/ml stem cell factor, 20 ng/ml IL-3, 50 ng/ml IL-9, and 2

130 U/ml erythropoietin. All cytokines were recombinant mouse cytokines (Peprotech,  
131 Rocky Hill, NJ) except the erythropoietin (Eprex; Janssen-Cilag, High Wycombe,  
132 UK), which was human.

133

#### 134 *Flow cytometry analysis*

135 FlowJo v10 (Treestar, Ashland, OR) produced the flow cytometry plots. Diffusion  
136 map and principal component analysis plots of flow cytometry data were generated  
137 using the R programming environment. Briefly, the flow cytometry events were  
138 down-sampled according to the population with the least number of events. Duplicate  
139 entries were removed, and the parameters representing fluorescent markers log-  
140 transformed. Variables were z-scored and diffusion map plots generated using the  
141 *destiny* and *ggplot2* packages. Principal component analysis (PCA) was calculated  
142 using the *prcomp* function. Data projection was performed using the *predict* function.

143

#### 144 *Single-cell RNA sequencing and analysis*

145 Single-cells were FACS index sorted into lysis buffer, and single-cell RNA  
146 sequencing was performed based on the Smart-Seq2 protocol.<sup>9</sup> Protocols and single-  
147 cell RNA sequencing data generated for this article have been deposited in the Gene  
148 Expression Omnibus database (accession numbers GSE128003 and GSE128074).  
149 Single-cell RNA sequencing data of bone marrow BMCPs, analyzed in Dahlin et al  
150 (2018),<sup>3</sup> are available through GSE106973.

151

152 Sequencing data were aligned using GSNAP<sup>10</sup> to Ensembl genome build 81<sup>11</sup> and  
153 gene counts were obtained using HT-Seq<sup>12</sup>. Quality control filtering and  
154 normalization was performed in the R programming environment. Quality control was

155 performed to exclude cells with fewer than 500,000 reads mapping to nuclear genes  
156 or with over 25% of mapped reads mapping to ERCC spike-ins. For the peritoneal  
157 cells, PCA of the quality control-filtered samples showed that two cells separated  
158 from the rest of the sample in principal component (PC) 1 (Figure S2A). Genes with  
159 high PC1 loadings were highly significantly enriched for B cell related genes, so these  
160 two outlier cells were suspected to be contaminating B cells and excluded from  
161 further analysis. Cells were then normalized using Scran<sup>13</sup> and highly variable genes  
162 were identified using the ERCC spike-ins to estimate technical variance<sup>14</sup>. This  
163 identified 3330 highly variable genes for the basophil dataset and 1832 highly  
164 variable genes for the mast cell dataset.

165

166 Downstream analysis was performed using the scanpy v1.4 python module<sup>15</sup>. Inbuilt  
167 scanpy functions were used for PCA and diffusion map dimensionality reduction.  
168 Differential expression between cell types was performed using the  
169 *rank\_genes\_groups* function with the *t-test\_overestim\_var* option for testing. P-values  
170 were adjusted using the benjamini-hochberg method for correcting for multiple  
171 testing, and genes with adjusted p-value < 0.01 were considered significant. Gene list  
172 enrichment analysis was performed using the *enrichr* function from the *gseapy* python  
173 module<sup>16,17</sup>. Cell cycle scoring was performed on scaled data using the scanpy  
174 *score\_genes\_cell\_cycle* function with S phase and G2/M phase gene lists downloaded  
175 from Macosko et al<sup>18</sup>. Bone marrow BMCP cells from Dahlin et al (2018)<sup>3</sup> were  
176 projected into the PCA space of the peritoneal cells and the k=10 closest peritoneal  
177 neighbors of each bone marrow cell were identified in these co-ordinates. Figure 3B  
178 was then generated by scoring how frequently each peritoneal cell was the nearest  
179 neighbor of a bone marrow BMCP. Peritoneal mast cells were ordered in pseudotime

180 using the diffusion pseudotime (DPT) scanpy implementation<sup>19</sup>. Due to cell cycle  
181 effects confounding the diffusion map and DPT analysis, basophil progenitor cells  
182 were ordered in pseudotime by ordering cells along PC1. Genes with dynamic  
183 expression in pseudotime were identified following the method of Tusi et al.<sup>2</sup> Briefly,  
184 gene expression was first smoothed along pseudotime using a sliding window of size  
185 20. For each ordering, the windows with minimum and maximum gene expression  
186 were identified, and a t-test performed between the values in each of these windows,  
187 giving a p-value for each gene. To generate a background distribution, this analysis  
188 was repeated for a random shuffling of cells along pseudotime. The adjusted p-value  
189 for each gene was then calculated as the fraction of shuffled p-values across all genes  
190 that were less than the p-value of the gene in question for non-permuted data. Genes  
191 with adjusted p-value < 0.01 were then treated as dynamic across pseudotime and  
192 plotted in the heatmaps. Gene expression in the heatmap was smoothed using a  
193 sliding window of size 20 and z-score transformed for each gene. To identify groups  
194 of genes with different pseudotime dynamics, genes were clustered using Louvain  
195 clustering<sup>20</sup> with the scanpy implementation, with the nearest neighbor matrix calculated  
196 on the full pseudotime expression matrix. The resolution was chosen to obtain 2  
197 clusters for each dataset: downregulated and upregulated genes. Mast cell and  
198 basophil signature gene sets were obtained from Dwyer et al,<sup>21</sup> who used microarray  
199 analysis on bulk samples to characterize gene expression specific to these mature cell  
200 types. Statistical overlap between gene lists was calculated using a hypergeometric  
201 test. Panther v14.1 was used to identify the dynamic mast cell genes annotated as  
202 proteases (Panther category PC00190)<sup>22</sup>. To plot gene expression trends along  
203 pseudotime the genSmooth Curves function from the monocle R package<sup>23</sup> was used  
204 to fit smooth spline curves for the expression of each gene against pseudotime. When

205 all genes were plotted together expression values of each gene were scaled by  
206 dividing values by the maximum of that gene along pseudotime to account for the  
207 very different dynamic ranges across genes. Interactive websites for plotting gene  
208 expression and flow cytometry data are hosted at <http://128.232.224.252/bas/> and  
209 <http://128.232.224.252/per/> for the basophil and mast cell dataset, respectively.

210

211

212 **Results**

213 *Multicolor flow cytometry analysis reveals the basophil and mast cell differentiation*  
214 *trajectories*

215 Basophil and mast cell differentiation are closely linked, and the cells share a  
216 common bipotent progenitor (Figure 1A). Here, we used multicolor flow cytometry to  
217 map these branching trajectories at the single-cell level. Flow cytometry analysis of  
218 mouse bone marrow cells captured BMCPs and cells of the basophil differentiation  
219 trajectory (Figure 1Bi,ii).<sup>3,24</sup> As the late mast cell differentiation takes place at  
220 peripheral sites, parallel analysis of peritoneal cells identified BMCP-like cells and  
221 mast cells (Figure 1Biii). Dimensionality reduction with a diffusion map algorithm  
222 enabled 2-dimensional visualization of the flow cytometry single-cell datasets, which  
223 covered 5 cell populations recorded with 9 fluorescent and 2 light scatter parameters.  
224 The diffusion map visualization revealed a bifurcation at the BMCP stage,  
225 establishing the putative entry points to the basophil and mast cell trajectories (Figure  
226 1C). The diffusion map embedding further visualized the progression from BMCP,  
227 through basophil progenitors, to basophils. The mast cell trajectory exhibited a similar  
228 pattern, with differentiation of BMCP-like cells to mature mast cells.

229

230 Plotting individual surface markers in the diffusion map allowed us to investigate how  
231 the proteins are expressed during differentiation. For example, loss of CD34 in  
232 combination with downregulation of c-Kit marked the progression from BMCPs to  
233 basophils (Figure 1D), and loss of integrin  $\beta 7$  in c-Kit<sup>+</sup> cells was associated with  
234 differentiation along the trajectory from BMCPs to mast cells (Figure 1D). Taken  
235 together, the flow cytometry dataset provides a template of basophil-mast cell

236 differentiation at single-cell level and highlights the bifurcation towards the two  
237 lineages.

238

239 *Single-cell profiling captures progression of basophil differentiation in the bone*  
240 *marrow*

241 Analysis by flow cytometry suggested that the flow cytometry gating strategies we  
242 used could be capturing a continuum of differentiation towards basophils and mast  
243 cells. To first identify changes in gene expression programs during basophil  
244 differentiation, we performed single-cell RNA-sequencing of basophil progenitor  
245 (BaP) cells and basophil (Ba) cells from mouse bone marrow. Both principal  
246 component analysis (PCA) and diffusion maps showed separation between the  
247 majority of cells from the two sorting gates (Figure 2A, Figure S1A). To investigate  
248 which genes were driving this separation, we performed differential gene expression  
249 analysis, identifying 212 genes upregulated and 833 genes downregulated in Ba cells  
250 compared to BaPs (Table S1). Enrichment analysis of these gene lists revealed that  
251 upregulated genes were enriched for granulocyte immune response terms (Figure  
252 S1B). Downregulated genes were enriched for cell cycle related terms (Figure 2B),  
253 suggesting a difference in cell cycle behavior throughout the differentiation process.  
254 This observation is in line with other hematopoietic differentiation pathways, where  
255 progenitors commonly lose proliferative capacity as they mature into the fully  
256 differentiated cell types.

257

258 To further explore this, we then performed analysis to computationally assign cell  
259 cycle state to the single-cell profiles.<sup>18</sup> Consistent with the gene list enrichment  
260 analysis, the majority of cells in the BaP gate were assigned to S and G2M states



261 (69%), whereas 87% of cells in the Ba gate were assigned to G1 state (Figure 2C, D).  
262 The effect of cell cycle status was clear in the diffusion map dimensionality reduction  
263 (Figure S1C), confounding attempts to order cells using pseudotime algorithms such  
264 as diffusion pseudotime (DPT). Instead, downregulation of progenitor marker genes  
265 such as *Cd34* and *Kit* indicated that ordering cells along the first principal component  
266 (PC) could be used to arrange cells in pseudotime (Figure S1D). Visualization of cell  
267 surface markers measured by index sorting also showed clear dynamics of the  
268 different surface markers along PC1 (Figure 2E). As expected, CD34 and c-Kit  
269 protein expression showed a negative correlation with pseudotime (compare Figure  
270 1D and 2E), which indicates their downregulation during basophil differentiation. In  
271 addition, the basophil marker CD49b (DX5) showed a positive correlation with  
272 pseudotime ordering (Figure 2E).

273

274 Using the PC1 pseudotime ordering, we then identified genes that dynamically  
275 changed during differentiation (Figure 2F). Clustering sorted these dynamic genes  
276 into two groups: one increasing and one decreasing with differentiation (Table S2).  
277 Basophil differentiation was associated with upregulation of *Hdc*, which is associated  
278 with histamine synthesis, and increased expression of the basophil gene E-cadherin  
279 (*Cdh1*). We further observed downregulation of the proteases *Mcpt8*, *Prss34* and *Ctsg*  
280 and upregulation of the transcription factors *Cebpa*, *Stat5b*, and *Spi1* (Figure 2G). To  
281 validate the full lists of dynamically regulated genes, we compared these to mast cell  
282 and basophil signature genes identified using bulk microarray analysis.<sup>21</sup> Genes  
283 upregulated during basophil differentiation exhibited a significant overlap with the  
284 previously described basophil signature genes ( $p = 4.0 \times 10^{-29}$ , hypergeometric test,  
285 Figure S1Ei), whereas genes that were downregulated during differentiation had

286 significant overlap with the previously described mast cell signature genes ( $p = 1.3 \times$   
287  $10^{-4}$ , hypergeometric test, Figure S1Eii).

288

289 Together, this analysis offers a description of the dynamics of gene expression during  
290 basophil differentiation and highlights changes in cell cycle activity as one of the  
291 major occurrences during this maturation process.

292

293 *Single-cell gene expression analysis suggests a continuum of mast cell differentiation*  
294 *in the peritoneal cavity*

295 After exploring the basophil progenitors, we next decided to focus on mast cell  
296 differentiation in the peritoneal cavity. The flow cytometry data suggested the  
297 existence of both BMCP-like peritoneal cells and peritoneal mast cells (Figure 1), so  
298 we performed single-cell RNA-sequencing on these populations to characterize them  
299 based on gene expression. A subset of the BMCP-like cells clustered separately from  
300 the mast cells in the diffusion map plot, demonstrating a difference between the  
301 transcriptome of these cells and the peritoneal mast cells (Figure 3A). In previous  
302 work we characterized bone marrow BMCPs at the single-cell gene expression level.<sup>3</sup>  
303 To examine the similarity of these bone marrow progenitors to the peritoneal mast  
304 cell differentiation, single-cell bone marrow BMCP profiles from Dahlin et al<sup>3</sup> were  
305 projected onto the peritoneal dataset (Figure 3B). This demonstrated that the BMCP-  
306 like peritoneal cells furthest from the peritoneal MCs were most similar to the bone  
307 marrow BMCPs, supporting that these were the most immature cells in the dataset.

308

309 To understand expression changes during mast cell maturation, we then performed  
310 pseudotime ordering of the peritoneal cells using DPT (Figure 3C). As expected,

311 interrogation of cell surface markers along the pseudotime ordering showed a strong  
312 downregulation of integrin  $\beta 7$  and strong upregulation of markers such as *Sca1* and  
313 ST2 (compare Figure 1D and 3D). Genes exhibiting dynamic expression patterns  
314 were identified and clustered as for the basophil trajectory (Table S3, Figure 3E).  
315 Annotation from the Panther database<sup>22</sup> was used to interrogate the two gene clusters  
316 for overlap with specific annotated gene sets such as proteases. Protease genes  
317 downregulated during mast cell differentiation included *Mcpt8* and *Gzmb*, whereas  
318 *Cpa3*, *Cma1*, *Mcpt1*, *Mcpt4*, *Tpsb2*, and *Tpsab1* increased with differentiation (Figure  
319 3F). To investigate the temporal induction and loss of protease genes, we changed  
320 visualization method and scaled the gene expression according to the cell with  
321 maximum expression (instead of z-scoring genes across the dataset). Plotting the  
322 maximum value-scaled gene expression revealed the gene dynamics across the  
323 pseudotime trajectory. Early onset proteases included *Cpa3*, followed by *Tpsb2*, and  
324 finally *Tpsab1*, indicating that the protease induction occurs in stages (Figure 3G, raw  
325 values for individual genes shown in Figure S2C).

326

327 To validate the full lists of dynamically regulated genes in the peritoneal mast cell  
328 dataset, we compared these to mast cell and basophil signature identified in Dwyer et  
329 al.<sup>21</sup> The upregulated genes significantly overlapped with the mast cell signature  
330 genes ( $p = 3.7 \times 10^{-65}$ , hypergeometric test, Figure S2Di). Upregulated genes included  
331 *Ndst2*, *Meis2* and *Hdc* (Figure 3H). Some genes showed expression enrichment  
332 mainly in the mast cells (*Meis2*), whereas others were expressed more evenly across  
333 the trajectory except for lower expression at the beginning of pseudotime (*Ndst2*).  
334 There was also a small overlap between the downregulated genes and basophil  
335 signature genes ( $p = 2.5 \times 10^{-5}$ , hypergeometric test, Figure S2Dii). To investigate the

336 link between gene and protein expression we also interrogated the expression of *Itga4*  
337 and *Itgb7*, which encode subunits of Integrin  $\beta 7$ . *Itga4* was significantly  
338 downregulated with a similar expression pattern to integrin  $\beta 7$  in the flow cytometry  
339 data whereas *Itgb7* was not significantly dynamically changing in pseudotime (Figure  
340 3D, H).

341

342 *BMCP-like cells in the peritoneal cavity exhibit basophil and mast cell-forming*  
343 *potential*

344 The flow cytometry-based and transcriptional analyses revealed an immature cell  
345 population with BMCP-like characteristics in the peritoneal cavity. However, a  
346 population of bipotent peritoneal BMCPs has not previously been described at this  
347 site. We therefore explored whether the protein and transcriptional analyses  
348 successfully predicted the developmental state of the peritoneal BMCP-like cells and  
349 mast cells. FACS-isolated BMCP-like cells and mast cells were cytochemically  
350 stained with May-Grünwald Giemsa. Primary BMCP-like cells displayed little  
351 cytoplasm that contained no or few granules, consistent with the morphology of blasts  
352 (Figure 4A). In contrast, primary mast cells were filled with numerous metachromatic  
353 granules, in agreement with a mature morphology (Figure 4A).

354

355 We cultured the peritoneal cells to investigate whether the BMCP-like cell population  
356 exhibited capacity to generate basophils and mast cells. BMCP-like cells cultured  
357 with IL-3 and stem cell factor generated c-Kit<sup>-</sup> FcεRI<sup>+</sup> CD49b<sup>+</sup> basophils and c-Kit<sup>+</sup>  
358 FcεRI<sup>+</sup> mast cells, whereas primary mast cells only displayed mast cell-forming  
359 capacity (Figure 4B-D).

360

361 By contrast to bulk cultured cells, only cell-fate assays performed at the single-cell  
362 level have the potential to reveal whether the BMCP-like population consists of  
363 bipotent progenitors. Therefore, single BMCP-like cells and mast cells were index  
364 sorted into individual wells, the resulting colony sizes were measured, and the  
365 colonies were subjected to flow cytometry analysis and cytochemical staining. To  
366 visualize the cell culture data, we first performed principal component analysis of the  
367 flow cytometry data presented in Figure 1C, henceforth referred to as the reference  
368 dataset (Figure 4E). We then projected the FACS index sort data onto the principal  
369 component space of the reference dataset, and plotted colony size and colony type  
370 data in the same embedding (Figure 4F). Analysis of colony sizes showed that  
371 colonies derived from BMCP-like cells were large, whereas cells along the mast cell  
372 trajectory exhibited reduced proliferation rate (Figure 4F). Notably, the cell-fate  
373 assays revealed that primary BMCP-like cells formed pure basophil colonies, pure  
374 mast cell colonies or mixed basophil-mast cell colonies (Figure 4F, S3A). Colonies  
375 derived from single mast cells were too small to analyze with flow cytometry.  
376 However, mast cells cultured in bulk remained mast cells as expected (Figure 4C-D,  
377 S3B-C).

378

379 We also cultured the BMCP-like peritoneal cells in erythroid-promoting conditions,  
380 as the early basophil-mast cell differentiation is closely linked to the erythrocyte  
381 trajectory.<sup>2</sup> However, no erythroid output was observed (Figure S4), indicating that  
382 the BMCP-like cells indeed consisted of bipotent basophil-mast cell progenitors.  
383 Taken together, the cell culture assays revealed that the protein and gene expression  
384 analyses successfully predicted the differentiation state of the BMCP-like cell  
385 population. Our study therefore not only identifies a previously unknown bipotent

386 peritoneal progenitor, but also provides comprehensive molecular profiles for this  
387 progenitor as well as the mast cell and basophil differentiation trajectories.

388

### 389 **Discussion**

390 Here, we combine flow cytometry analysis, single-cell transcriptomics, and cell fate  
391 assays to chart the basophil and mast cell differentiation trajectories. Multicolor flow  
392 cytometry analysis reveals a developmental bifurcation with bipotent BMCPs and  
393 their progression into each respective mature lineage. High-coverage single-cell RNA  
394 sequencing allows us to generate a molecular map of the cell differentiation, and  
395 pseudotime ordering reveals dynamically regulated genes during development. We  
396 further demonstrate how flow cytometry and transcriptomics analysis can successfully  
397 predict cell-forming potential.

398

399 Single-cell transcriptomics coupled with index sorting of thousands of bone marrow  
400 HSPCs has previously been used to chart the erythrocyte and granulocyte-monocyte  
401 differentiation.<sup>25,26</sup> BMCPs represent a minor fraction of the bone marrow HSPCs,  
402 and capturing the early basophil-mast cell axis therefore requires analysis of tens of  
403 thousands of HSPCs.<sup>3</sup> The early differentiation of progenitors with mast cell-forming  
404 capacity occurs in the bone marrow.<sup>8</sup> However, full mast cell differentiation and  
405 maturation takes place at peripheral sites,<sup>8</sup> and we therefore specifically sorted Lin<sup>-</sup> c-  
406 Kit<sup>+</sup> FcεRI<sup>+</sup> cells extracted from the peritoneal cavity of mice to capture this process.  
407 Unlike cell extraction from tissues such as the intestine or skin, the isolation of cells  
408 from peritoneum does not require enzymatic digestion, thus minimizing external  
409 stimuli during cell processing. Basophil differentiation takes place in bone marrow,  
410 and we therefore analyzed basophils and their progenitors from this site. The

411 combined peritoneal and bone marrow datasets provide a high-resolution map  
412 covering the BMCP bifurcation and the mast cell and basophil differentiation.

413

414 BMCPs have been described in the spleen and bone marrow,<sup>3,24</sup> and the presence of a  
415 bipotent progenitor population indicates that there is a close association between the  
416 basophil and mast cell differentiation trajectories. Recent data suggest that the  
417 erythroid axis is coupled with the basophil and/or mast cell fates.<sup>2,4,27</sup> However, we  
418 did not observe erythrocyte-forming potential among 163 sorted BMCP-like cells in  
419 the peritoneum. In agreement with this, BMCPs in the spleen and bone marrow are  
420 unable to generate erythrocytes,<sup>3,24</sup> altogether suggesting that loss of erythrocyte-  
421 forming potential is a relatively early event along the differentiation trajectory from  
422 hematopoietic stem cells to basophil and mast cells. A similar differentiation process  
423 has been suggested in human hematopoiesis.<sup>27</sup>

424

425 Temporal ordering of the cells in the transcriptomic datasets allows exploration and  
426 verification of molecular processes in differentiating basophils and mast cells. We  
427 show that *Ndst2* (encoding *N*-deacetylase/*N*-sulphotransferase-2) is upregulated  
428 during differentiation from BMCPs to mature mast cells, and this was also associated  
429 with the appearance of numerous densely stained granules. In agreement with these  
430 findings, dense May-Grünwald Giemsa staining of the peritoneal mast cell granules  
431 requires sulphated heparin, which is dependent on *Ndst2* expression.<sup>28</sup> Histamine is  
432 present in basophil and mast cells, and is quickly released upon cell activation. This  
433 potent mediator causes allergic reactions, and we show that the expression of the  
434 enzyme that catalyzes the histamine synthesis, histidine decarboxylase (*Hdc*),  
435 increased upon differentiation of both basophils and mast cells. Analysis of the single-

436 cell transcriptomics data can also give insights into more complex regulatory  
437 processes. For example, autologous expression of integrin  $\beta 7$  is important for mast  
438 cell progenitor migration into tissues, such as lung and intestine.<sup>29,30</sup> Downregulation  
439 of integrin  $\beta 7$  on the cell surface is a hallmark of terminal mast cell differentiation,<sup>31</sup>  
440 which we confirmed with flow cytometry analysis. However, we did not observe  
441 downregulation of the *Itgb7* gene expression during the transition from BMCPs to  
442 mast cells. Notably, integrins constitute  $\alpha\beta$  heterodimers when localized to the cell  
443 surface, and further investigation into the gene expression profile revealed decreased  
444 expression of *Itga4*, the binding partner of the integrin  $\beta 7$  subunit, upon  
445 differentiation. Thus, the loss of integrin  $\alpha 4$  gene expression likely explains the loss  
446 of integrin  $\beta 7$  protein expression on the cell surface during the BMCP to mast cell  
447 transition.

448

449 During basophil differentiation, the transcription factors *Stat5b* and *Cebpa* are  
450 upregulated along the progression of pseudotime. The expression of C/EBP $\alpha$  is  
451 STAT5-dependent, and both genes are required for basophil formation.<sup>24,32</sup> Dynamic  
452 expression of transcription factors with currently unknown functions in basophil and  
453 mast cell differentiation was also recognized. For example, *Spi1*, which encodes  
454 PU.1, is upregulated during late basophil differentiation. It is known to be involved in  
455 neutrophil granulocyte maturation,<sup>33,34</sup> but the role of PU.1 in basophil differentiation  
456 is yet to be delineated. During mast cell differentiation, we describe the increase of  
457 the transcription factor *Meis2*. Primary mast cells from human skin express this  
458 transcription factor,<sup>35</sup> but the potential function during mast cell differentiation is yet  
459 to be described. Thus, the datasets can be explored to identify previously  
460 unrecognized genes that may regulate basophil and mast cell differentiation.



461

462 Microarray analyses reported previously provide detailed gene expression patterns of  
463 mature hematopoietic cell populations, including bulk-sorted mature basophils and  
464 mast cells.<sup>21</sup> We observed that differentiation into basophils and mast cells involves  
465 activation of mutually exclusive lineage programs. However, a small subset of the  
466 previously reported signature genes is not unique to mature cells, but can also be  
467 observed in bipotent progenitors. For example, we show that *Mcpt8* expression is not  
468 restricted to basophils but is also expressed by BMCPs. This in fact provides an  
469 explanation to a major conundrum in the field. Basophils, identified as *Mcpt8*-  
470 expressing cells, have been reported to exhibit potential to transdifferentiate into mast  
471 cells.<sup>36</sup> Our results show that a more likely scenario is that a subset of the previously  
472 reported *Mcpt8*-expressing cells constitutes bipotent BMCPs that can give rise to mast  
473 cells.

474

475 Dimensionality reduction approaches are commonly applied to visualize single-cell  
476 transcriptomics data. Here, we show that the diffusion map embedding and PCA  
477 visualization successfully separate the basophil and mast cell differentiation  
478 trajectories based on the multidimensional flow cytometry data. We took advantage of  
479 the flow cytometry-based PCA visualization to interrogate single-cell fate assay data.  
480 The visualization showed that the in vitro proliferative capacity of the index-sorted  
481 peritoneal cells is quickly reduced as BMCP-like cells differentiate and enter the mast  
482 cell trajectory. In addition, only the most immature BMCP-like cells exhibit capacity  
483 to form basophil, mast cell, and mixed basophil-mast cell colonies. Taken together,  
484 dimensionality reduction techniques of flow cytometry data combined with cell fate  
485 assays provide new insights into basophil and mast cell differentiation.

486

487 In summary, here we have reported the generation of transcriptomic and flow  
488 cytometry data capturing the progression from bipotent progenitors toward basophil  
489 or mast cells. Our resource provides a detailed description of the expression changes  
490 occurring during this differentiation process at the single-cell level. A user-friendly  
491 interactive website has been created for the wider community to enable further  
492 exploration of the data.

493

#### 494 **Authorship contributions**

495 J.S.D. and W.W.Y.L. performed experiments; E.D. mapped sequencing data; F.K.H.,  
496 J.S.D., and X.W. analyzed single-cell RNA sequencing data; J.S.D. analyzed flow  
497 cytometry and cell culture experiments; N.K.W. contributed to important discussions;  
498 I.K. created the web resource; B.G. and J.S.D. supervised the study; B.G. secured  
499 funding; F.K.H. and J.S.D. drafted the manuscript; and all authors contributed to final  
500 version of the manuscript.

501

#### 502 **Acknowledgements**

503 We thank Chiara Cossetti, Gabriela Grondys-Kotarba, and Reiner Schulte at the  
504 Cambridge Institute for Medical Research Flow Cytometry Core for their assistance  
505 with cell sorting. J.S.D. is supported by funding from the Swedish Research Council,  
506 the Swedish Cancer Society, and Karolinska Institutet. Research in B.G.'s laboratory  
507 is supported by Bloodwise, Wellcome, CRUK, MRC and by core funding from  
508 Wellcome and MRC to the Wellcome-MRC Cambridge Stem Cell Institute. F.K.H. is  
509 funded by a MRC Physical Biology of Stem Cells PhD studentship and by part of a

510 Wellcome Strategic Award (105031/D/14/Z) awarded to W. Reik, S. Teichmann, J.

511 Nichols, B.D. Simons, T. Voet, S. Srinivas, L. Vallier, B.G. and J.C. Marioni.

512

513

514 **References**

515

- 516 1. Akashi K, Traver D, Miyamoto T, Weissman IL. A clonogenic common  
517 myeloid progenitor that gives rise to all myeloid lineages. *Nature*. 2000;404:193-197.
- 518 2. Tusi BK, Wolock SL, Weinreb C, Hwang Y, Hidalgo D, Zilionis R, Waisman  
519 A, Huh JR, Klein AM, Socolovsky M. Population snapshots predict early  
520 haematopoietic and erythroid hierarchies. *Nature*. 2018;555:54-60.
- 521 3. Dahlin JS, Hamey FK, Pijuan-Sala B, Shepherd M, Lau WWY, Nestorowa S,  
522 Weinreb C, Wolock S, Hannah R, Diamanti E, Kent DG, Gottgens B, Wilson NK. A  
523 single-cell hematopoietic landscape resolves 8 lineage trajectories and defects in Kit  
524 mutant mice. *Blood*. 2018;131:e1-e11.
- 525 4. Drissen R, Thongjuea S, Theilgaard-Monch K, Nerlov C. Identification of two  
526 distinct pathways of human myelopoiesis. *Sci Immunol*. 2019;4.
- 527 5. Pellin D, Loperfido M, Baricordi C, Wolock SL, Montepeloso A, Weinberg  
528 OK, Biffi A, Klein AM, Biasco L. A comprehensive single cell transcriptional  
529 landscape of human hematopoietic progenitors. *Nat Commun*. 2019;10:2395.
- 530 6. Velten L, Haas SF, Raffel S, Blaszkiewicz S, Islam S, Hennig BP, Hirche C,  
531 Lutz C, Buss EC, Nowak D, Boch T, Hofmann WK, Ho AD, Huber W, Trumpp A,  
532 Essers MA, Steinmetz LM. Human haematopoietic stem cell lineage commitment is a  
533 continuous process. *Nat Cell Biol*. 2017;19:271-281.
- 534 7. Nathan C. Points of control in inflammation. *Nature*. 2002;420:846-852.
- 535 8. Grootens J, Ungerstedt JS, Nilsson G, Dahlin JS. Deciphering the  
536 differentiation trajectory from hematopoietic stem cells to mast cells. *Blood Adv*.  
537 2018;2:2273-2281.

- 538 9. Picelli S, Faridani OR, Bjorklund AK, Winberg G, Sagasser S, Sandberg R.  
539 Full-length RNA-seq from single cells using Smart-seq2. *Nat Protoc.* 2014;9:171-  
540 181.
- 541 10. Wu TD, Nacu S. Fast and SNP-tolerant detection of complex variants and  
542 splicing in short reads. *Bioinformatics.* 2010;26:873-881.
- 543 11. Zerbino DR, Achuthan P, Akanni W, Amode MR, Barrell D, Bhai J, Billis K,  
544 Cummins C, Gall A, Giron CG, Gil L, Gordon L, Haggerty L, Haskell E, Hourlier T,  
545 Izuogu OG, Janacek SH, Juettemann T, To JK, Laird MR, Lavidas I, Liu Z, Loveland  
546 JE, Maurel T, McLaren W, Moore B, Mudge J, Murphy DN, Newman V, Nuhn M,  
547 Ogeh D, Ong CK, Parker A, Patricio M, Riat HS, Schuilenburg H, Sheppard D,  
548 Sparrow H, Taylor K, Thormann A, Vullo A, Walts B, Zadissa A, Frankish A, Hunt  
549 SE, Kostadima M, Langridge N, Martin FJ, Muffato M, Perry E, Ruffier M, Staines  
550 DM, Trevanion SJ, Aken BL, Cunningham F, Yates A, Flicek P. Ensembl 2018.  
551 *Nucleic Acids Res.* 2018;46:D754-D761.
- 552 12. Anders S, Pyl PT, Huber W. HTSeq--a Python framework to work with high-  
553 throughput sequencing data. *Bioinformatics.* 2015;31:166-169.
- 554 13. Lun AT, Bach K, Marioni JC. Pooling across cells to normalize single-cell  
555 RNA sequencing data with many zero counts. *Genome Biol.* 2016;17:75.
- 556 14. Brennecke P, Anders S, Kim JK, Kolodziejczyk AA, Zhang X, Proserpio V,  
557 Baying B, Benes V, Teichmann SA, Marioni JC, Heisler MG. Accounting for  
558 technical noise in single-cell RNA-seq experiments. *Nat Methods.* 2013;10:1093-  
559 1095.
- 560 15. Wolf FA, Angerer P, Theis FJ. SCANPY: large-scale single-cell gene  
561 expression data analysis. *Genome Biol.* 2018;19:15.

- 562 16. Chen EY, Tan CM, Kou Y, Duan Q, Wang Z, Meirelles GV, Clark NR,  
563 Ma'ayan A. Enrichr: interactive and collaborative HTML5 gene list enrichment  
564 analysis tool. *BMC Bioinformatics*. 2013;14:128.
- 565 17. Kuleshov MV, Jones MR, Rouillard AD, Fernandez NF, Duan Q, Wang Z,  
566 Koplev S, Jenkins SL, Jagodnik KM, Lachmann A, McDermott MG, Monteiro CD,  
567 Gundersen GW, Ma'ayan A. Enrichr: a comprehensive gene set enrichment analysis  
568 web server 2016 update. *Nucleic Acids Res*. 2016;44:W90-97.
- 569 18. Macosko EZ, Basu A, Satija R, Nemes J, Shekhar K, Goldman M, Tirosh I,  
570 Bialas AR, Kamitaki N, Martersteck EM, Trombetta JJ, Weitz DA, Sanes JR, Shalek  
571 AK, Regev A, McCarroll SA. Highly Parallel Genome-wide Expression Profiling of  
572 Individual Cells Using Nanoliter Droplets. *Cell*. 2015;161:1202-1214.
- 573 19. Haghverdi L, Buttner M, Wolf FA, Buettner F, Theis FJ. Diffusion  
574 pseudotime robustly reconstructs lineage branching. *Nat Methods*. 2016;13:845-848.
- 575 20. Blondel VD, Guillaume J-L, Lambiotte R, Lefebvre E. Fast unfolding of  
576 communities in large networks. *Journal of Statistical Mechanics: Theory and  
577 Experiment*. 2008;2008.
- 578 21. Dwyer DF, Barrett NA, Austen KF, Immunological Genome Project C.  
579 Expression profiling of constitutive mast cells reveals a unique identity within the  
580 immune system. *Nat Immunol*. 2016;17:878-887.
- 581 22. Mi H, Muruganujan A, Ebert D, Huang X, Thomas PD. PANTHER version  
582 14: more genomes, a new PANTHER GO-slim and improvements in enrichment  
583 analysis tools. *Nucleic Acids Res*. 2019;47:D419-D426.
- 584 23. Trapnell C, Cacchiarelli D, Grimsby J, Pokharel P, Li S, Morse M, Lennon  
585 NJ, Livak KJ, Mikkelsen TS, Rinn JL. The dynamics and regulators of cell fate

- 586 decisions are revealed by pseudotemporal ordering of single cells. *Nat Biotechnol.*  
587 2014;32:381-386.
- 588 24. Arinobu Y, Iwasaki H, Gurish MF, Mizuno S, Shigematsu H, Ozawa H,  
589 Tenen DG, Austen KF, Akashi K. Developmental checkpoints of the basophil/mast  
590 cell lineages in adult murine hematopoiesis. *Proc Natl Acad Sci U S A.*  
591 2005;102:18105-18110.
- 592 25. Nestorowa S, Hamey FK, Pijuan Sala B, Diamanti E, Shepherd M, Laurenti E,  
593 Wilson NK, Kent DG, Gottgens B. A single-cell resolution map of mouse  
594 hematopoietic stem and progenitor cell differentiation. *Blood.* 2016;128:e20-31.
- 595 26. Paul F, Arkin Y, Giladi A, Jaitin DA, Kenigsberg E, Keren-Shaul H, Winter  
596 D, Lara-Astiaso D, Gury M, Weiner A, David E, Cohen N, Lauridsen FK, Haas S,  
597 Schlitzer A, Mildner A, Ginhoux F, Jung S, Trumpp A, Porse BT, Tanay A, Amit I.  
598 Transcriptional Heterogeneity and Lineage Commitment in Myeloid Progenitors.  
599 *Cell.* 2015;163:1663-1677.
- 600 27. Grootens J, Ungerstedt JS, Wu C, Hamberg Levedahl K, Nilsson G, Dahlin  
601 JS. CD203c distinguishes the erythroid and mast cell-basophil differentiation  
602 trajectories among human FcεRI(+) bone marrow progenitors. *Allergy.* 2019:E-  
603 pub ahead of print.
- 604 28. Forsberg E, Pejler G, Ringvall M, Lunderius C, Tomasini-Johansson B,  
605 Kusche-Gullberg M, Eriksson I, Ledin J, Hellman L, Kjellen L. Abnormal mast cells  
606 in mice deficient in a heparin-synthesizing enzyme. *Nature.* 1999;400:773-776.
- 607 29. Gurish MF, Tao H, Abonia JP, Arya A, Friend DS, Parker CM, Austen KF.  
608 Intestinal mast cell progenitors require CD49β7 (α4β7 integrin) for tissue-  
609 specific homing. *J Exp Med.* 2001;194:1243-1252.

- 610 30. Abonia JP, Hallgren J, Jones T, Shi T, Xu Y, Koni P, Flavell RA, Boyce JA,  
611 Austen KF, Gurish MF. Alpha-4 integrins and VCAM-1, but not MAdCAM-1, are  
612 essential for recruitment of mast cell progenitors to the inflamed lung. *Blood*.  
613 2006;108:1588-1594.
- 614 31. Dahlin JS, Ding Z, Hallgren J. Distinguishing Mast Cell Progenitors from  
615 Mature Mast Cells in Mice. *Stem Cells Dev*. 2015;24:1703-1711.
- 616 32. Qi X, Hong J, Chaves L, Zhuang Y, Chen Y, Wang D, Chabon J, Graham B,  
617 Ohmori K, Li Y, Huang H. Antagonistic regulation by the transcription factors  
618 C/EBPalpha and MITF specifies basophil and mast cell fates. *Immunity*. 2013;39:97-  
619 110.
- 620 33. Scott EW, Simon MC, Anastasi J, Singh H. Requirement of transcription  
621 factor PU.1 in the development of multiple hematopoietic lineages. *Science*.  
622 1994;265:1573-1577.
- 623 34. Anderson KL, Smith KA, Pio F, Torbett BE, Maki RA. Neutrophils deficient  
624 in PU.1 do not terminally differentiate or become functionally competent. *Blood*.  
625 1998;92:1576-1585.
- 626 35. Motakis E, Guhl S, Ishizu Y, Itoh M, Kawaji H, de Hoon M, Lassmann T,  
627 Carninci P, Hayashizaki Y, Zuberbier T, Forrest AR, Babina M, consortium F.  
628 Redefinition of the human mast cell transcriptome by deep-CAGE sequencing. *Blood*.  
629 2014;123:e58-67.
- 630 36. Metcalf D, Ng AP, Baldwin TM, Di Rago L, Mifsud S. Concordant mast cell  
631 and basophil production by individual hematopoietic blast colony-forming cells. *Proc*  
632 *Natl Acad Sci U S A*. 2013;110:9031-9035.
- 633
- 634



635

636

637

638 **Figure legends**

639 **Figure 1. Flow cytometry analysis reveals differentiation trajectories from**  
640 **bipotent basophil-mast cell progenitors to basophils and mast cells.**

641 (A) Illustration outlining the basophil and mast cell differentiation trajectories. (B)  
642 Flow cytometry-based gating strategies of (Bi) bipotent basophil-mast cell progenitors  
643 (BMCPs) from bone marrow, (Bii) basophil progenitors (BaP) and basophils (Ba)  
644 from bone marrow, and (Biii) BMCP-like cells and mast cells from peritoneal cavity.  
645 (C) Diffusion map visualization of the flow cytometry data colored by cell type. (D)  
646 Diffusion map visualization of the flow cytometry data colored by protein expression  
647 or light scatter parameters. The surface expression parameters and light scatter  
648 parameters are visualized on log-transformed and linear scales, respectively.  
649 Expression of lineage markers and viability staining are not shown. The data are  
650 representative of 4 independent experiments.

651

652 **Figure 2. Bone marrow basophil progenitors downregulate cell cycle genes**  
653 **during differentiation.** (A) PCA of scRNA-seq profiles colored by cell surface  
654 marker phenotype. PC, principal component. (B) Top 5 GO Biological Process terms  
655 associated with the genes significantly upregulated in BaP cells compared to Ba cells,  
656 ranked by adjusted p-value. Benjamini-Hochberg correction for multiple hypotheses  
657 testing. Genes upregulated in Ba compared to BaP are presented in Figure S1B. (C)  
658 Proportion of scRNA-seq profiles from each phenotype computationally assigned to  
659 G1, S or G2M cell cycle states based on gene expression. (D) PCA colored by cell  
660 cycle state. (E) Levels of cell surface markers for cells ordered by PC1 pseudotime.  
661 Index data values were log-transformed, smoothed along pseudotime by using a  
662 sliding window of size 20 and scaled between 0 and 1 for each marker. Correlation

663 values indicate the pearson correlation coefficient between pseudotime and the  
664 unsmoothed expression values for each surface marker. Colorbar at the top indicates  
665 the phenotypic cell type proportions within each window. Blue corresponds to  
666 entirely BaPs and orange to Ba cells. (F) Heatmap displaying the expression of genes  
667 dynamically expressed along the PC1 pseudotime ordering. The top colorbar indicates  
668 the cell type proportion in each window. Expression is smoothed along a sliding  
669 window and z-scored for each gene, and genes were clustered using Louvain  
670 clustering into groups showing different dynamics. (G) PCA colored by z-scored  
671 expression of specific genes. The data represents cells pooled from 4 individual mice.  
672

673 **Figure 3. Transcriptional profiling of peritoneal mast cell progenitors captures a**  
674 **differentiation continuum.** (A) Diffusion map dimensionality reduction of scRNA-  
675 seq profiles colored by cell phenotype. DC, diffusion component. (B) Projection of  
676 bone marrow BMCP progenitor scRNA-seq profiles from Dahlin et al (2018)<sup>3</sup> to their  
677 most similar expression profiles from the peritoneal dataset. Each peritoneal cell is  
678 colored by its similarity to the projected bone marrow cells, see methods for details.  
679 (C) Diffusion map colored by pseudotime ordering of cells. DPT, diffusion  
680 pseudotime. (D) Levels of cell surface markers for pseudotime ordered cells. Index  
681 data values were log-transformed, smoothed along pseudotime by using a sliding  
682 window of size 20 and scaled between 0 and 1 for each marker. Correlation values  
683 indicate the pearson correlation coefficient between pseudotime and the unsmoothed  
684 expression values for each surface marker. Colorbar at the top indicates the  
685 phenotypic cell type proportions within each window. Green corresponds to entirely  
686 BMCP-like cells and purple to MCs. (E) Heatmap displaying the expression of genes  
687 dynamically expressed along the pseudotime ordering. The top colorbar indicates the

688 proportion of cell type in each window. Expression is smoothed along a sliding  
689 window and z-scored for each gene, and genes were clustered using Louvain  
690 clustering into groups showing different dynamics. (F) Heatmap of dynamically  
691 regulated proteases showing z-scored gene expression along pseudotime. Genes were  
692 ordered using the hierarchical clustering indicated by the dendrogram. Colorbar  
693 indicates the Louvain cluster from (E) for each gene. (G) Expression trends of  
694 specific genes along pseudotime. Genes are scaled by their maximum expression  
695 value rather than z-scoring as in the heatmap. (H) Diffusion map colored by z-score  
696 scaled expression of specific genes. The data represents cells pooled from 3 individual  
697 mice.

698

699 **Figure 4. BMCP-like peritoneal cells exhibit potential to form basophils and**  
700 **mast cells.** (A-B) May-Grünwald Giemsa staining of primary and in vitro cultured  
701 BMCP-like cells and mast cells extracted from the peritoneal cavity. Ba, basophil;  
702 MC, mast cell. Two or seven independent experiments revealed the morphology of  
703 primary BMCP-like cells and mast cells, respectively. (C) Flow cytometry gating  
704 strategy to identify basophils and mast cells cultured from primary BMCP-like cells  
705 and mast cells. (D) Quantification of cell type output following bulk-culture and flow  
706 cytometry analysis of BMCP-like cells and mast cells. Pooled data from 4  
707 independent experiments per population are shown. The means and SEMs are shown.  
708 Unpaired two-tailed Student *t*-tests; \*\*\*\* $P < 0.0001$ . (E) Principal component analysis  
709 of the flow cytometry reference dataset, provided in Figure 1C, colored by cell type.  
710 (F) Projection of index-sorted cells into the principal component space of the  
711 reference dataset. The point size represents  $\log_{10}$ -transformed colony size and the

712 colors represent colony type following cell culture. Panel F shows data pooled from 2  
713 independent experiments. The cells were cultured with IL-3 and stem cell factor.

714

715

## 716 **Supplementary Figure legends**

717

718 Figure S1

719 (A) Diffusion map of Ba and BaP cells colored by their phenotypic cell type. DC,  
720 diffusion component. (B) Top 5 GO Biological Process terms associated with the  
721 genes significantly upregulated in Ba cells compared to BaP cells, ranked by adjusted  
722 p-value. Benjamini-Hochberg correction for multiple hypotheses testing. (C)  
723 Diffusion map colored by computationally assigned cell cycle state. (D) Diffusion  
724 map colored by expression of specific genes. (E) Overlap of basophil (Ba)  
725 differentiation up- (i) or down- (ii) regulated genes with mast cell and basophil  
726 signature gene sets from Dwyer et al. Significance of overlap was tested using a  
727 hypergeometric test, with resulting p-values displayed in figure. The Venn diagrams  
728 show genes annotated in Ensembl genome build 81 and Dwyer et al.

729

730 Figure S2

731 (A) PCA of peritoneal single-cell RNA-seq profiles showing outlier cells in PC1. PC,  
732 principal component. (B) Diffusion map dimensionality reduction colored by  
733 computationally assigned cell cycle state. DC, diffusion component. (C) Expression  
734 trends of specific genes along pseudotime. Splines were fitted using the monocle R  
735 package function. (D) Overlap of mast cell (MC) differentiation up- (i) or down- (ii)  
736 regulated genes with mast cell and basophil signature gene sets from Dwyer et al.

737 Significance of overlap was tested using a hypergeometric test, with resulting p-  
738 values displayed in figure. The Venn diagrams show genes annotated in Ensembl  
739 genome build 81 and Dwyer et al.

740

741 Figure S3.

742 (A) Flow cytometry assessment of colonies derived from single BMCP-like peritoneal  
743 cells. The same colonies were stained with May-Grünwald Giemsa. (B) Cultured  
744 bulk-sorted peritoneal mast cells provided as reference to panel A. (C) Single-cells  
745 were sorted into individual wells and the colony size was determined after 7 days in  
746 culture. The numbers above each group represent the number of wells analyzed. Each  
747 dot represents one well. Wells in which no viable cells were found were scored as 1.  
748 The red lines represent geometric means. The data in panel C are pooled from 2  
749 independent experiments. Two-tailed Mann-Whitney test; \*\*\*\* $P < 0.0001$ . The cells  
750 were cultured with IL-3 and stem cell factor.

751

752 Figure S4.

753 (A) Flow cytometry gating strategy for determining colony type following culture for  
754 6 days in erythrocyte-promoting conditions. E, erythroid; MC, mast cell; Ba, basophil.  
755 Culture of bulk-sorted bone marrow (BM) Lin<sup>-</sup> c-Kit<sup>+</sup> cells served as positive control  
756 for erythroid-forming potential. (B) Colony type output of single index-sorted BMCP-  
757 like cells projected into the principal component space of the reference dataset. The  
758 point size represents log<sub>10</sub>-transformed colony size. (C) Single-cells were sorted into  
759 individual wells and the colony size was determined after 6 days in culture. The  
760 number represents the number of wells analyzed. Each dot represents one well. Wells  
761 in which no viable cells were found were scored as 1. The red line represents

762 geometric mean. The data in panels B and C are pooled from 2 independent

763 experiments.

764

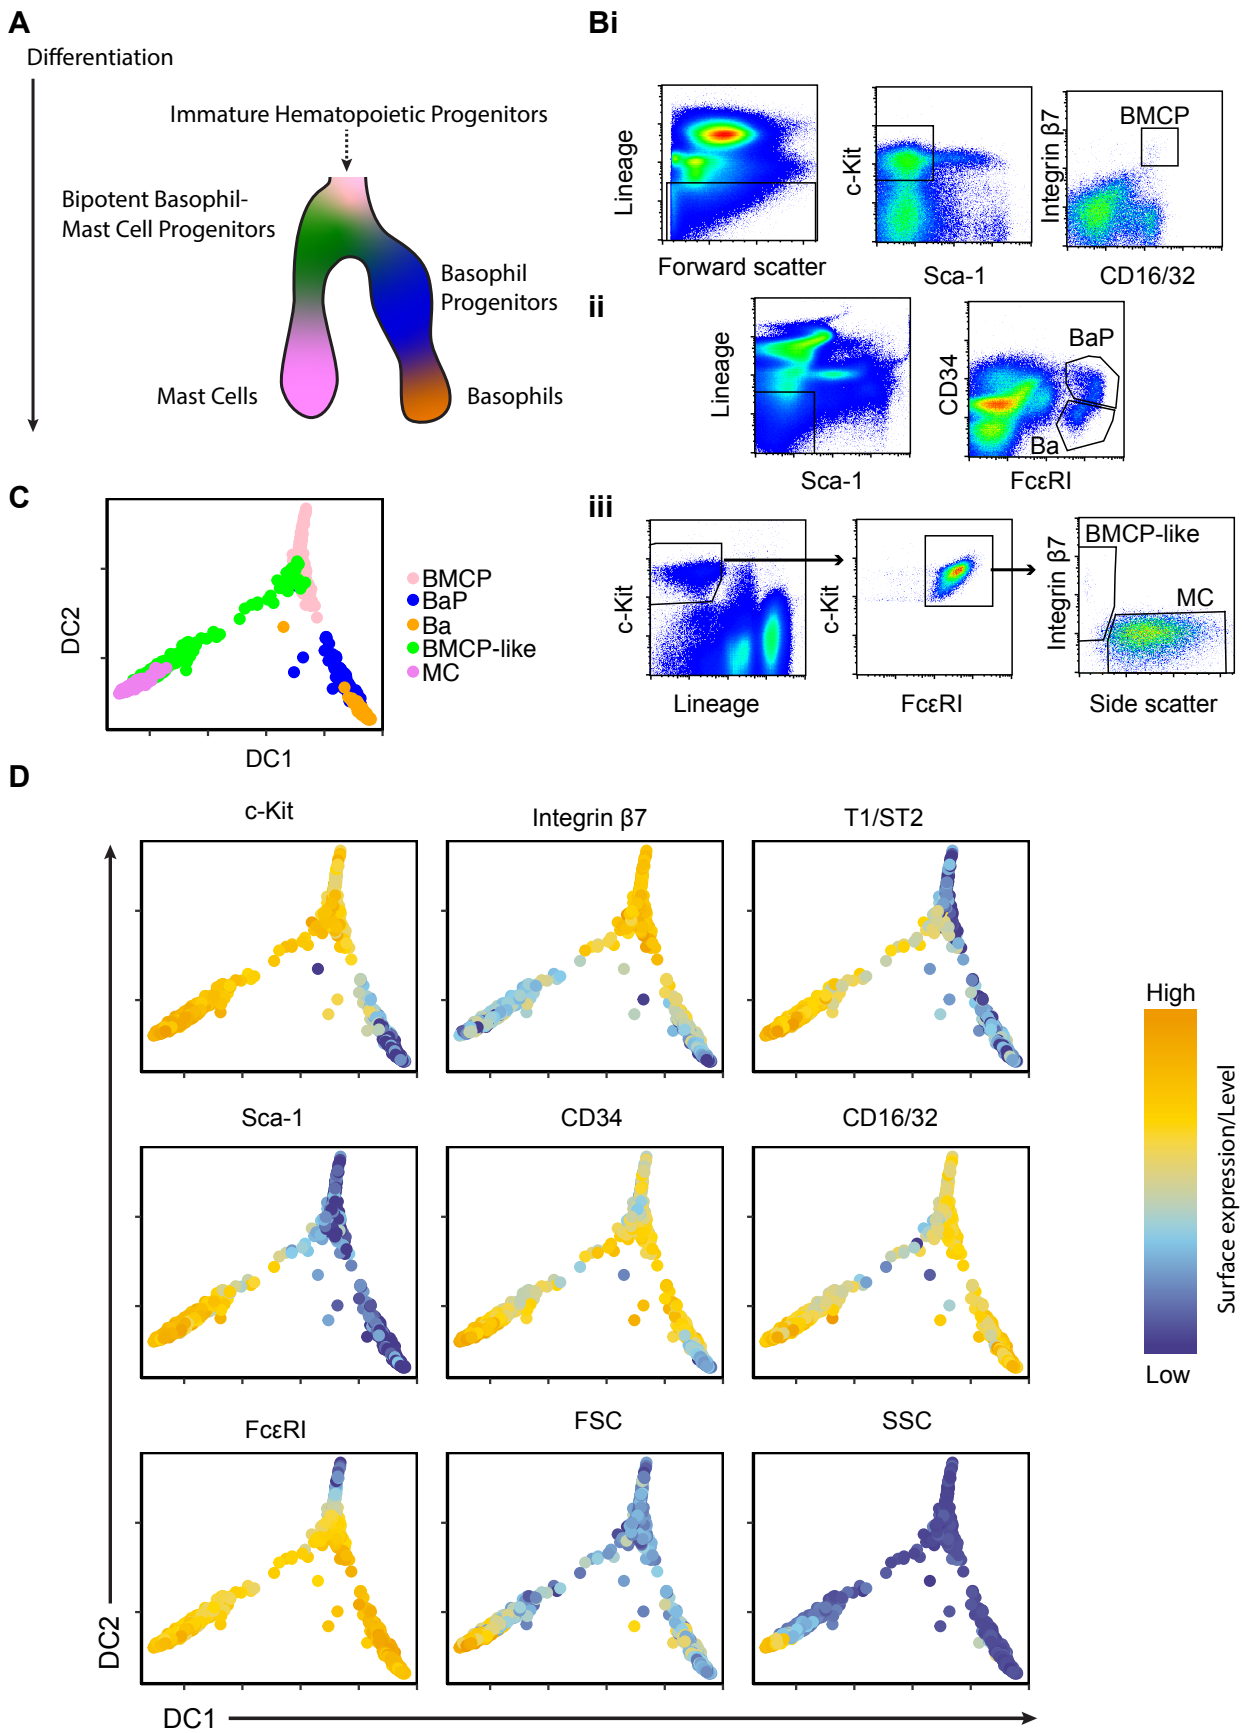

Figure 1



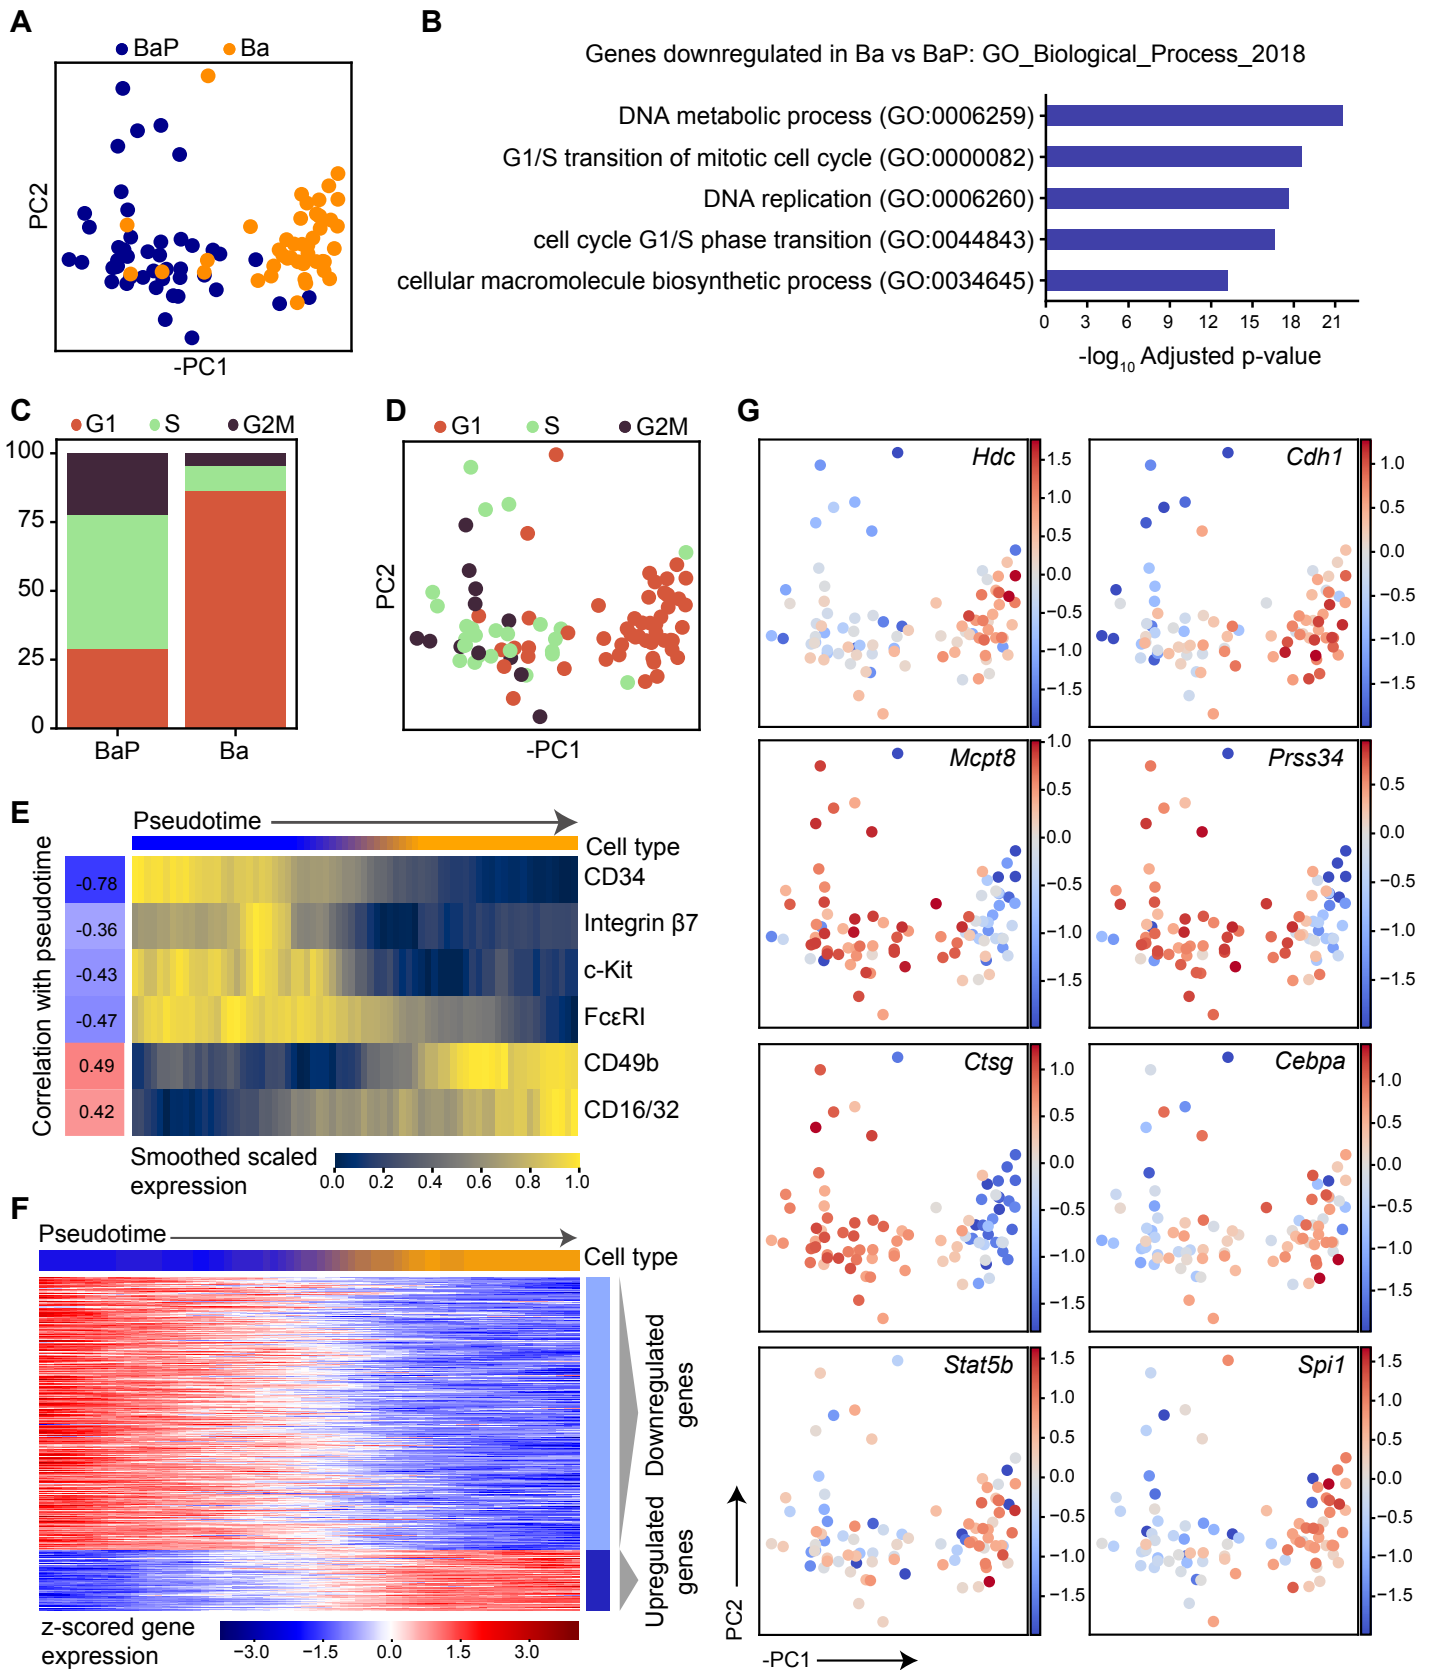

Figure 2

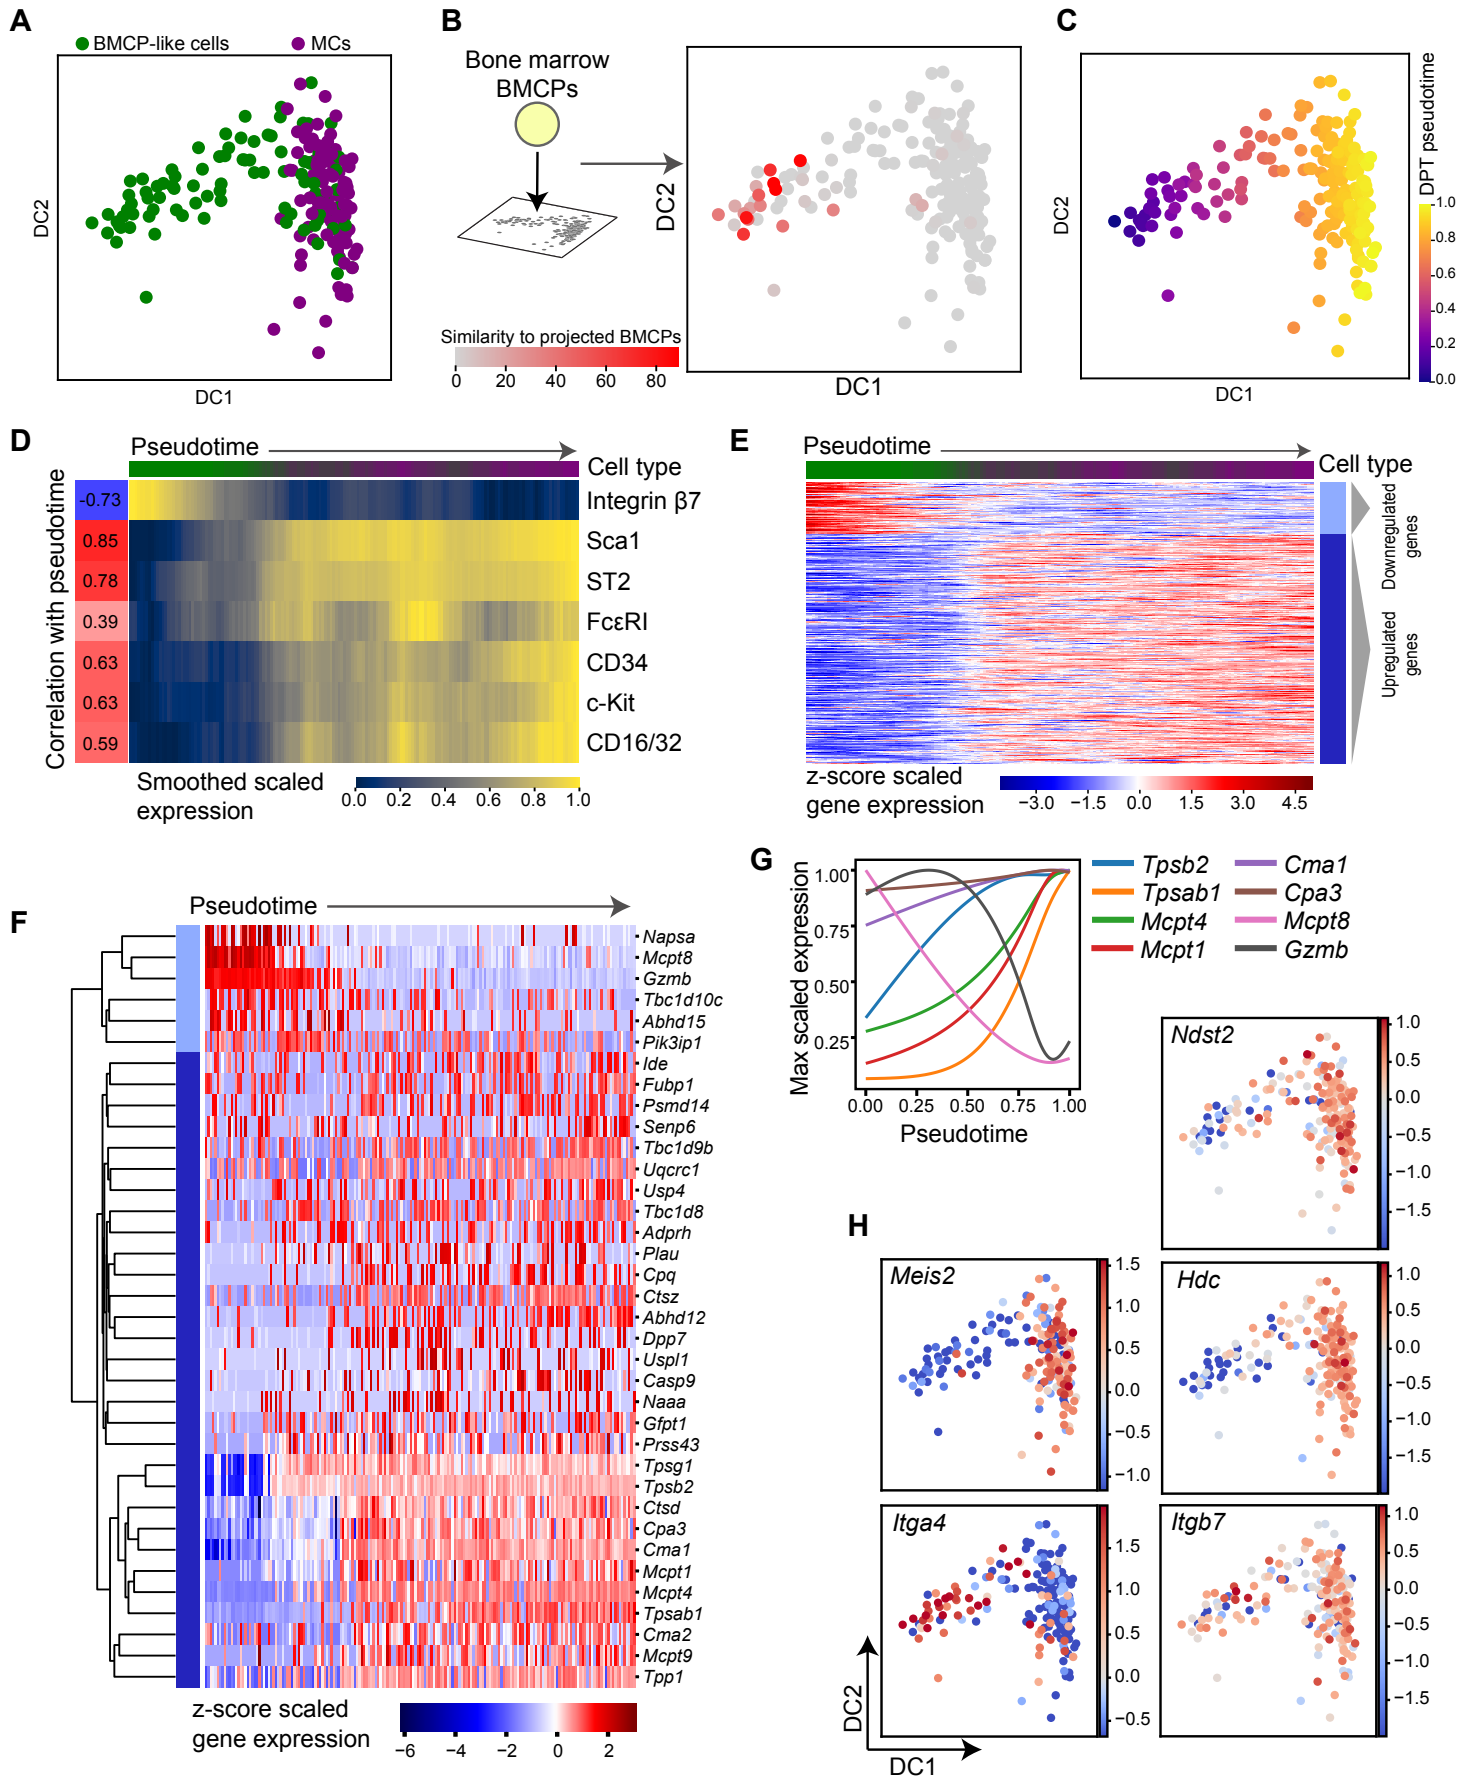

Figure 3

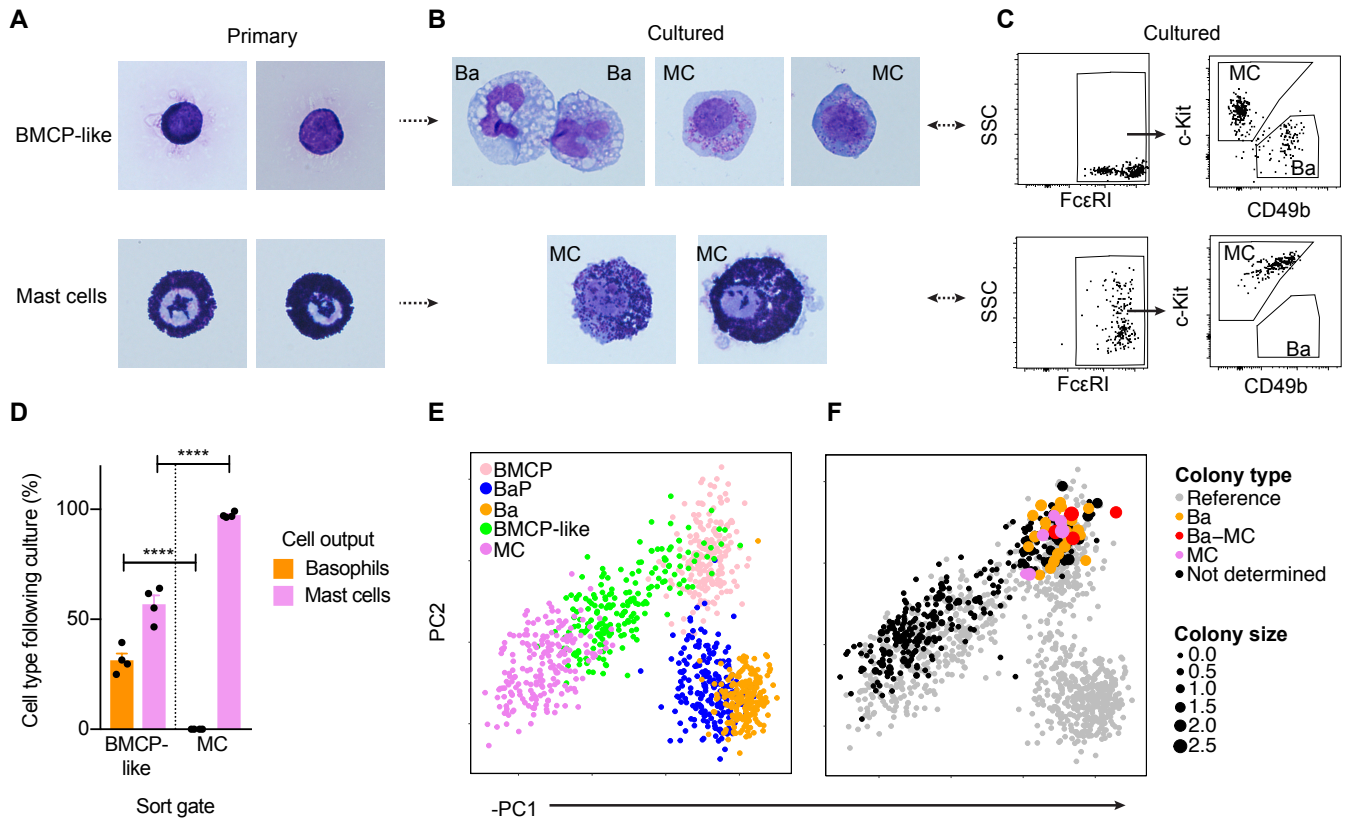

Figure 4

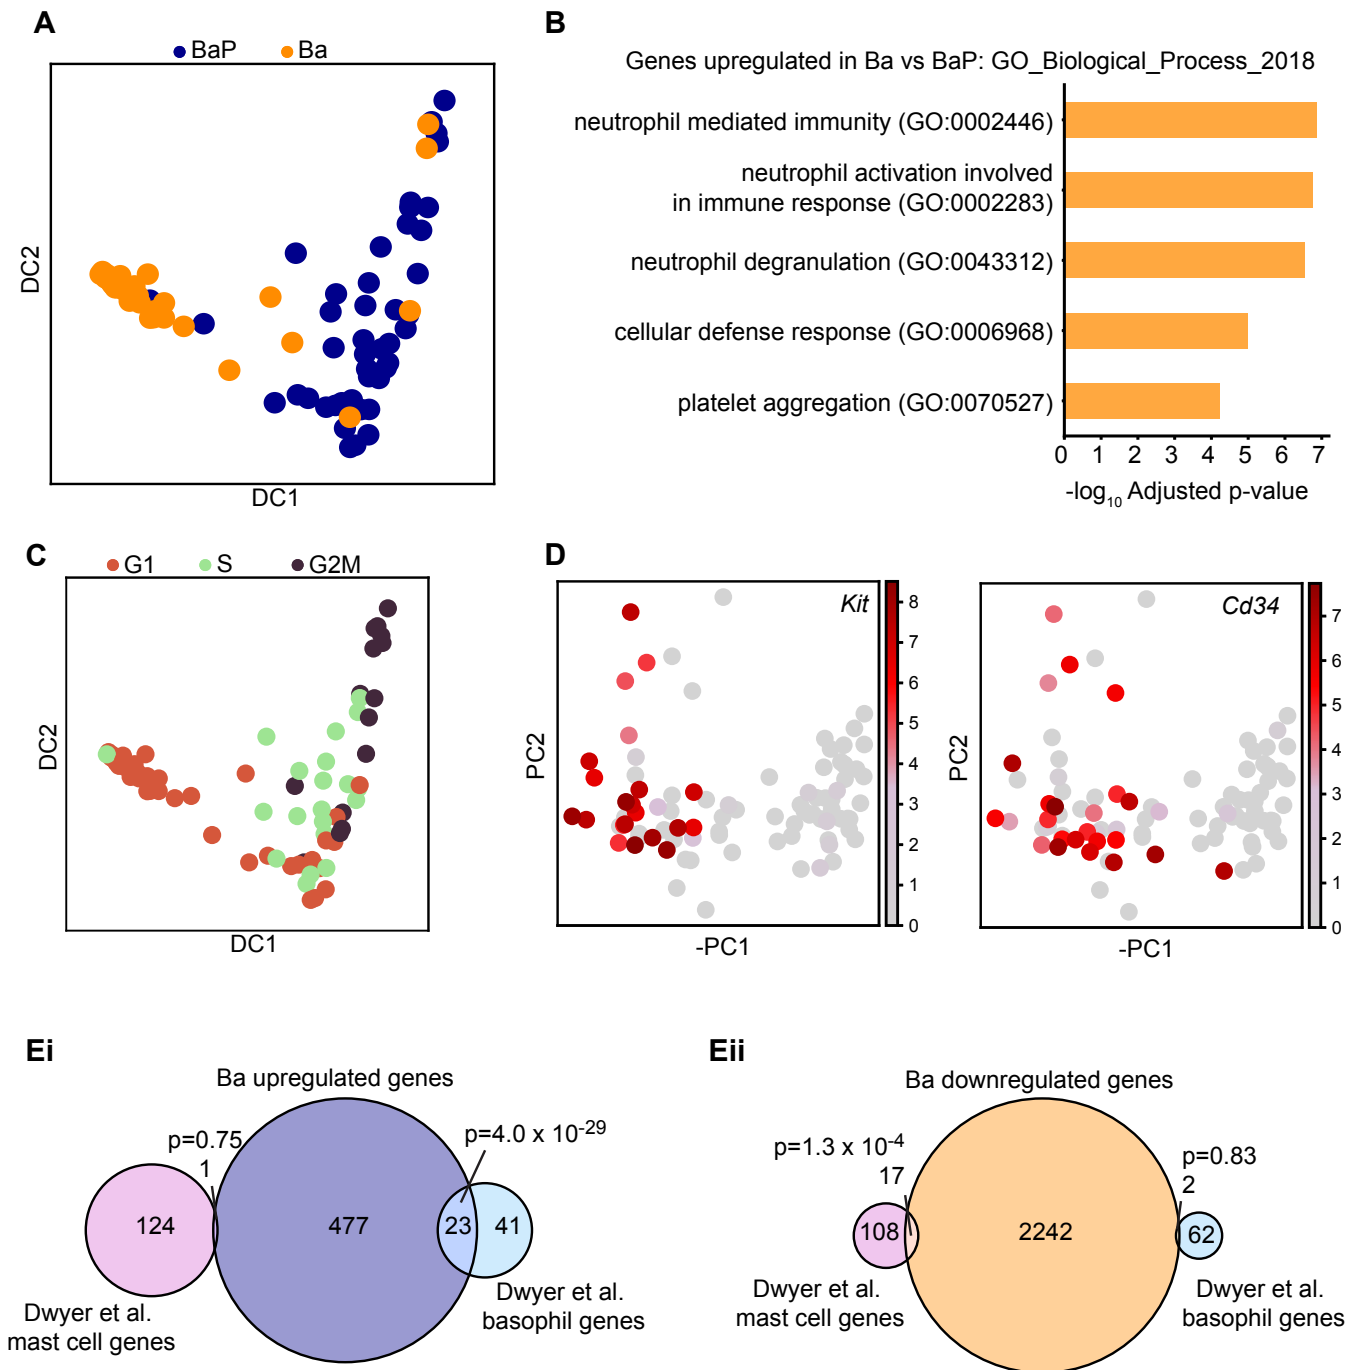

Figure S1

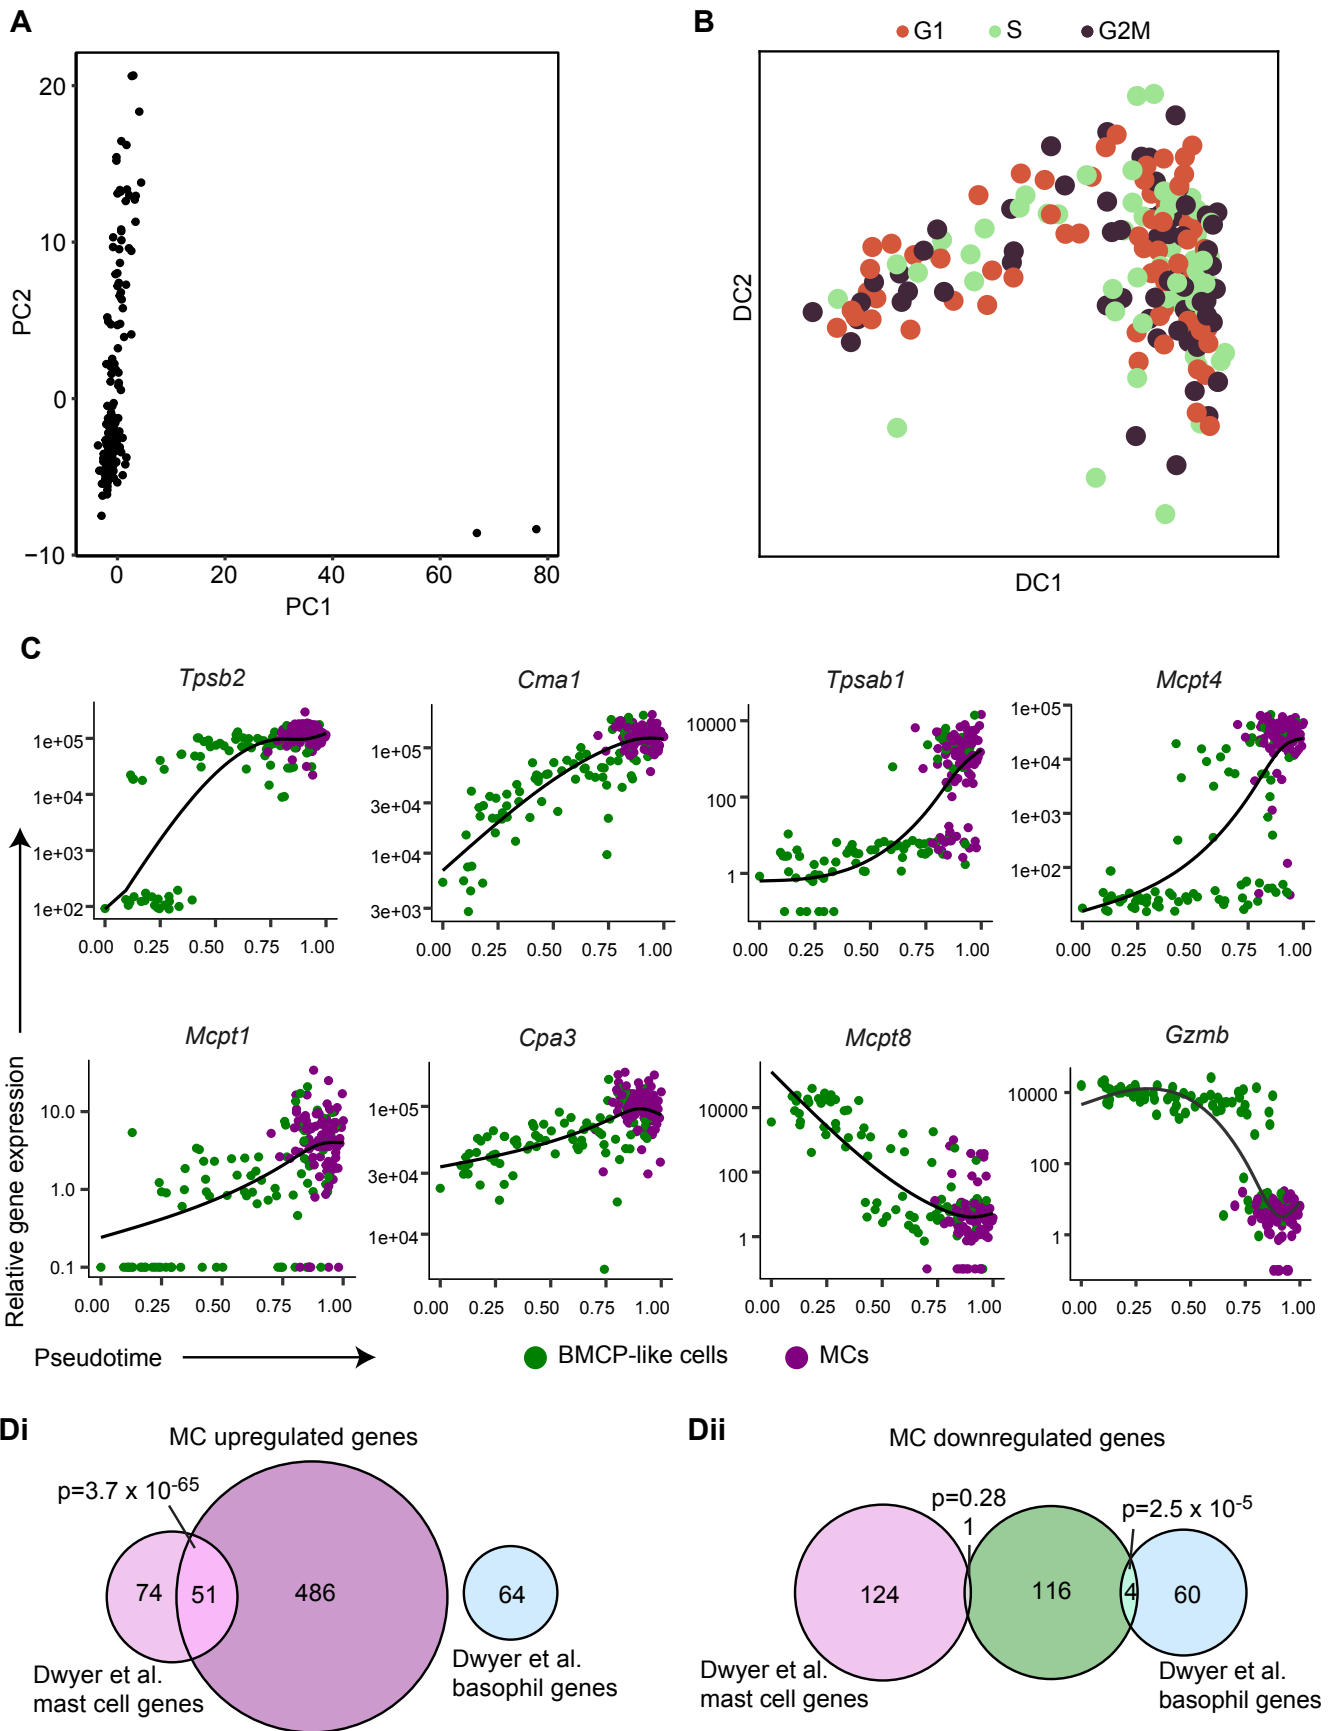

**Figure S2**

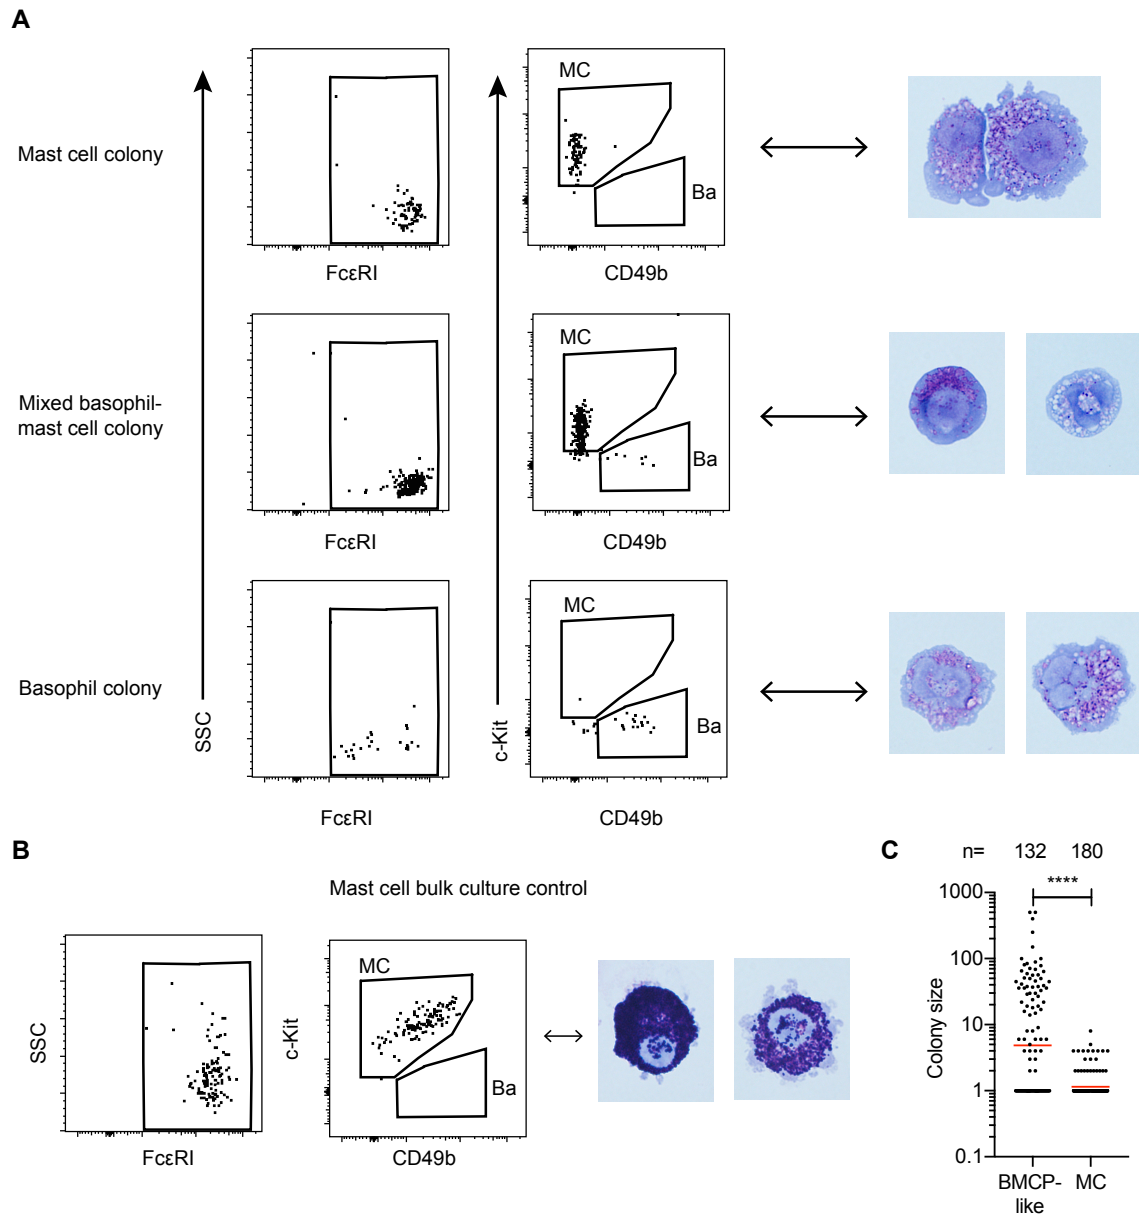

Figure S3

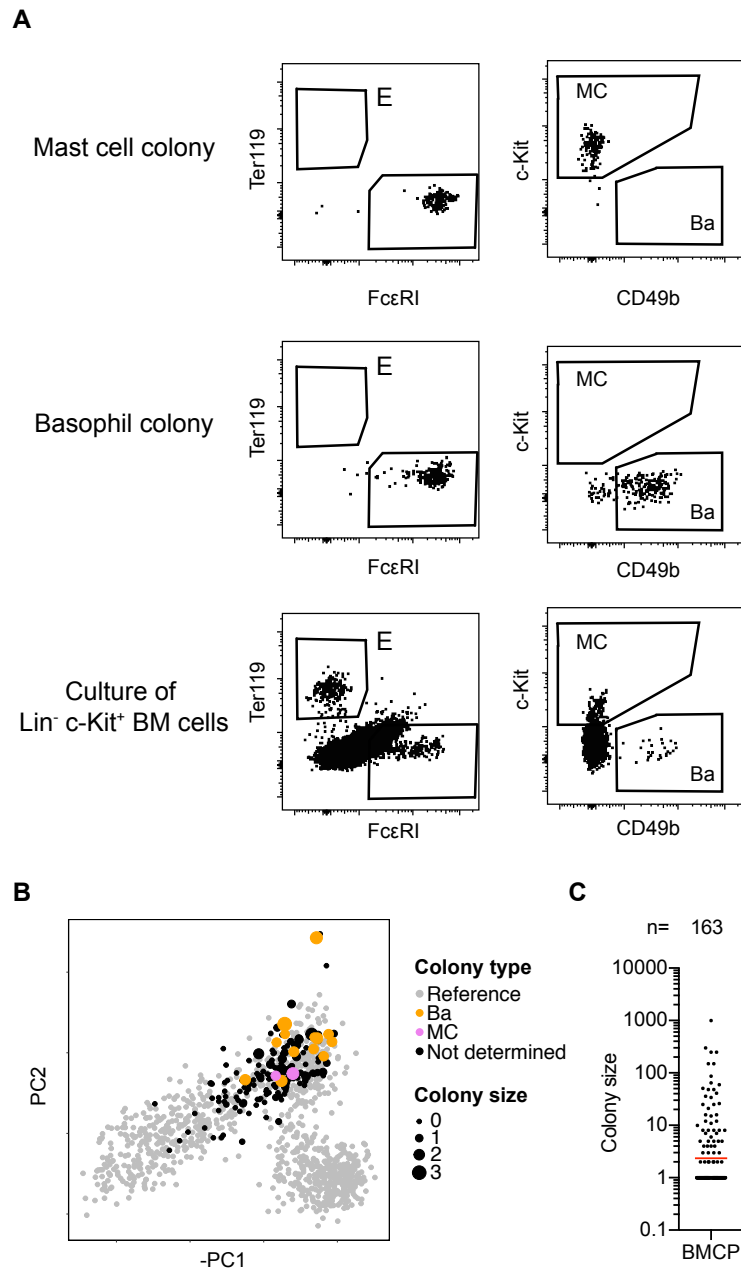

Figure S4
